# Supplementary material for: The prognostic value of Niemann-Pick C1-like protein 1 and Niemann-Pick disease type C2 in hepatocellular carcinoma
Source: PubMed Central journal article supplement — J Cancer. 2018 Jan 1;9(3):556–63. doi: 10.7150/jca.19996 (PMC5820923; doi:10.7150/jca.19996), 2018-01-01
Supplement: jcav09p0556s1.pdf [file jcav09p0556s1.pdf]

**Supplementary Table S1**

| Variable              | patient |
|-----------------------|---------|
| sex                   |         |
| Male                  | 8       |
| Female                | 2       |
| age                   |         |
| ≤ 50                  | 5       |
| >50                   | 5       |
| HBsAg                 |         |
| negative              | 1       |
| positive              | 9       |
| serum AFP             |         |
| ≤ 20 ng/ml            | 5       |
| >20ng/ml              | 5       |
| liver cirrhosis       |         |
| no                    | 6       |
| yes                   | 4       |
| TNM                   |         |
| I                     | 3       |
| II                    | 2       |
| III-IV                | 3       |
| Child-pugh class      |         |
| A                     | 10      |
| B                     | 0       |
| tumor size            |         |
| ≤5 cm                 | 4       |
| >5 cm                 | 6       |
| tumor number          |         |
| single                | 5       |
| multiple              | 5       |
| tumor differentiation |         |
| well                  | 0       |
| moderate              | 10      |
| Poor                  | 0       |
| vascular invasion     |         |
| no                    | 8       |
| yes                   | 2       |
